# Supplementary material
Source: Springer Nature journal article supplement (https://www.springermedizin.de/resource/supplementary/12974_2010_278_MOESM8_ESM.pdf/9601148)

Cell Volume ( $\mu\text{l}/\text{mg}$  Protein)

10  
8  
6  
4  
2  
0

Cont

$\text{NH}_4$

CKs

CKs  
+  $\text{NH}_4$

$\text{NH}_4$

CKs

CKs  
+  $\text{NH}_4$

\*

\*\*

\*\*

\*\*

BAY 11-7082 ( $5 \mu\text{M}$ )

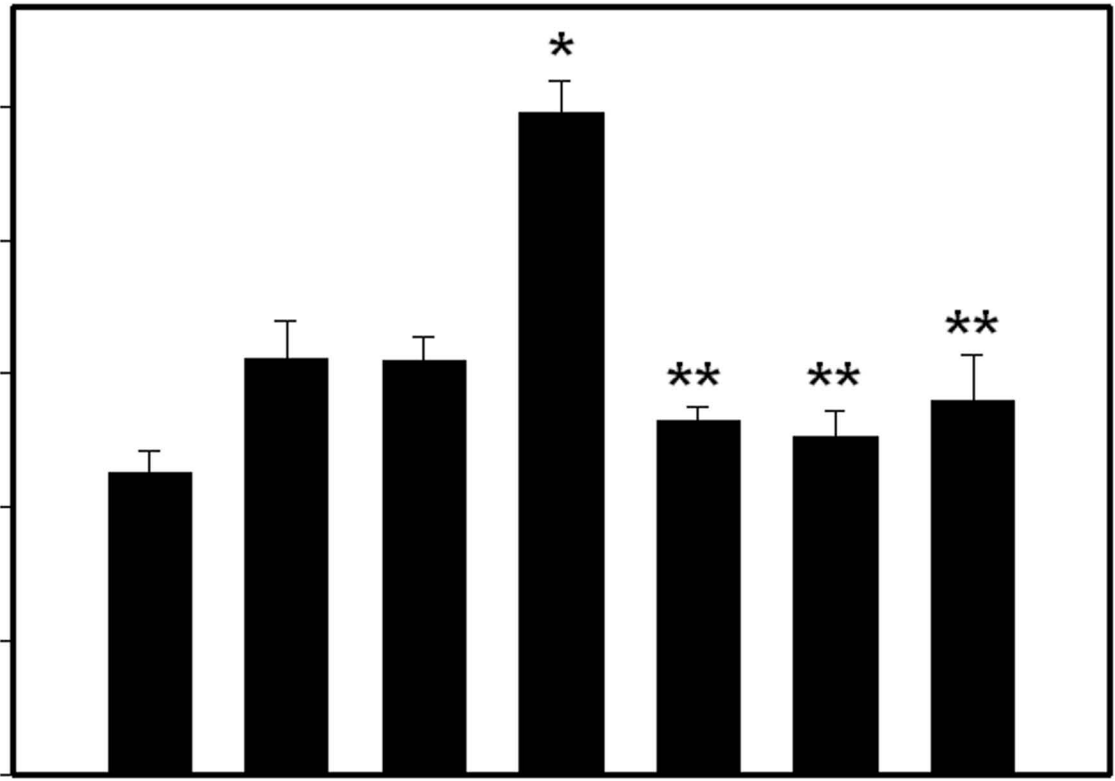

Supplement: MOESM8 [file 9601148]
